# Supplementary material for: Multi-ligand modified PC@DOX-PA/EGCG micelles effectively inhibit the growth of ER+, PR+ or HER2+ breast cancer
Source: Royal Society of Chemistry journal article supplement (doi:10.1039/d1tb02056k), 2021-12-09
Supplement: d1tb02056k1.pdf [file d1tb02056k1.pdf]

1 *Supporting information for manuscript*

2

3 **Multi-ligand modified PC@DOX-PA/EGCG micelles effectively inhibit the growth of**  
4 **ER<sup>+</sup>, PR<sup>+</sup> or HER<sup>2+</sup> breast cancer**

5

6 Xiaozhen Wang<sup>1</sup>, Jiecheng He<sup>1,2,3</sup>, Siyuan Jiang<sup>1,2,3</sup>, Yifei Gao<sup>1</sup>, Ling-Kun Zhang<sup>1</sup>, Liang Yin<sup>1</sup>,  
7 Rong You<sup>1</sup>, and Yan-Qing Guan<sup>1,2,3\*</sup>

8

9 <sup>1</sup>*School of Life Science, South China Normal University, Guangzhou, 510631, China*

10 <sup>2</sup>*Guangzhou Key Laboratory of Spectral Analysis and Functional Probes, College of*  
11 *Biophotonics, South China Normal University, Guangzhou 510631, China*

12 <sup>3</sup>*South China Normal University-Panyu Central Hospital Joint Laboratory of Translational*  
13 *Medical Research, Panyu Central Hospital, Guangzhou, 511400, China<sup>1</sup>*

14

15

16

---

\*Corresponding author at: School of Life Science, South China Normal University, Guangzhou 510631, P.R. China. Tel: (+86-20)85211241; *E-mail address*: guanyq@scnu.edu.cn (Y. Q. Guan).

The authors declare no competing financial interest.

# 1 Figure and Figure Captions

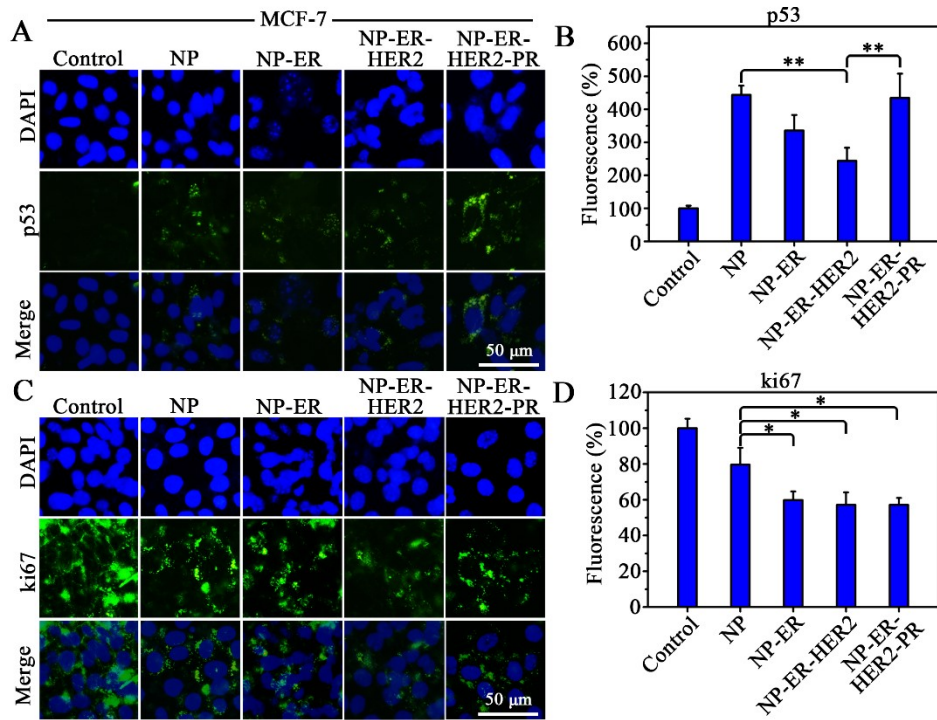

2

3 **Figure S1:** The treat effect of nanoparticle in MCF-7 cell. A,B: Immunofluorescence detect  
 4 the expression of Ki67 and P53 of MCF-7 cells after treated by, NP, NP-ER, NP-ER-HER2,  
 5 NP-ER-HER2-PR. C,D: Quantitative analysis the expression of Ki67 and P53 of MCF-7 cells  
 6 after treated by NP, NP-ER, NP-ER-HER2, and NP-ER-HER2-PR. \*p < 0.05.

7

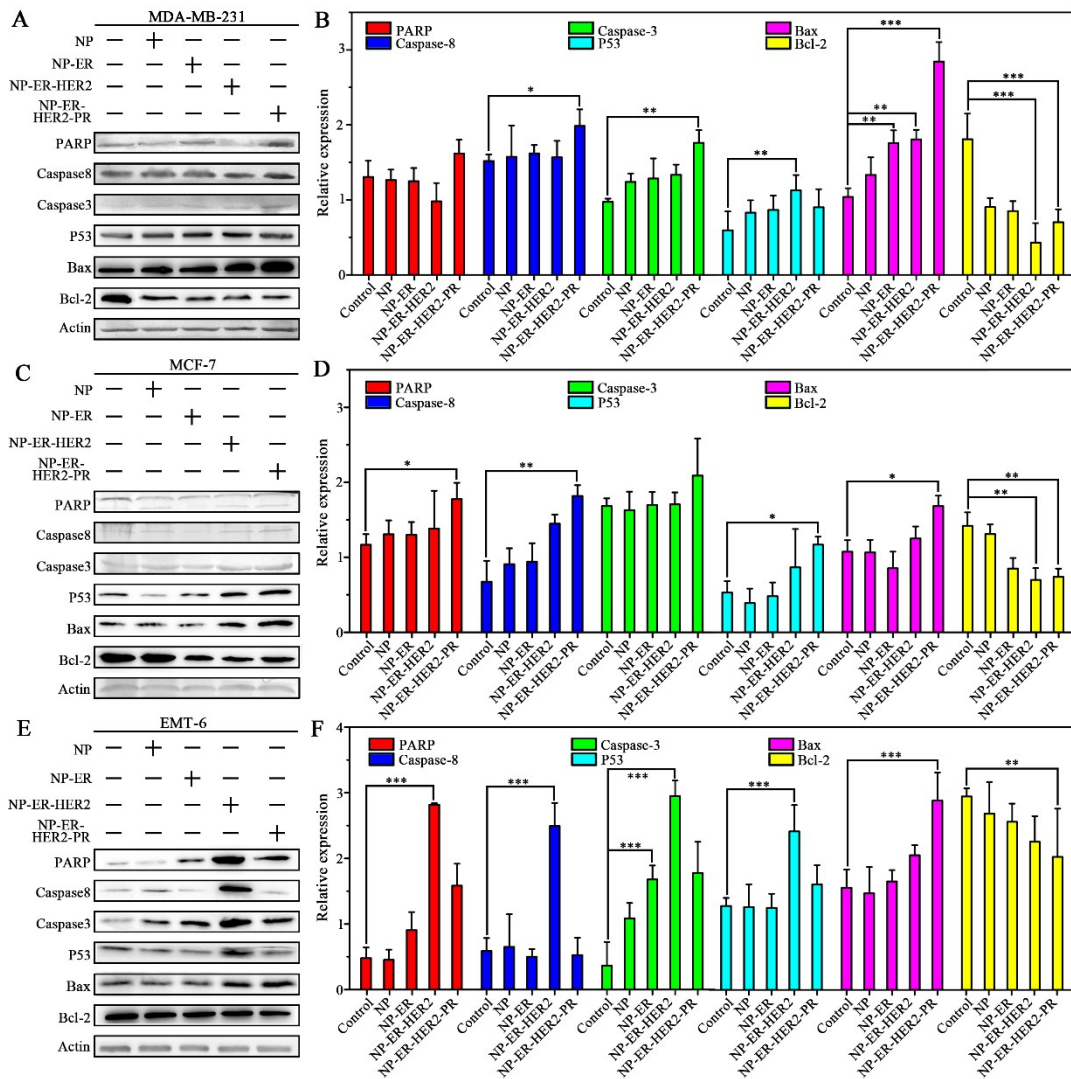

**Figure S2:** The therapy effect of targeted nanoparticles *in vitro*. A,B: Western blot detecting the expression of PARP, caspase-8, p53, caspase-3, bax and bcl-2 in MDA-MB-231 cells. C,D: Apoptosis related proteins PARP, caspase-8, p53, caspase-3, bax and bcl-2 express in MCF-7 cells. E,F: The expression of PARP, caspase-8, p53, caspase-3, bax and bcl-2 in EMT-6 cells. (n = 3, \*p < 0.05, \*\*p < 0.01, \*\*\*p < 0.001)

1  
2  
3  
4  
5  
6  
7  
8  
9
